# Supplementary material
Source: publisher site journal article supplement (https://jhr.pensoft.net/article/66829/download/suppl/31/)
Supplement: Supplementary file 1

**Supplementary Material**

**Table S1**. Morphological measurements descriptions based on Bolton (2000, page 5).

| Measurement and indices | Description |
| --- | --- |
| Total Length (TL) | Total length of the specimen from mandibular apex to posterior margin of tergite IV. |
| Head Length (HL) | Length of head from anterior clypeal margin to the midpoint of the occipital margin. |
| Head Width (HW) | Width of the head from the point of maximum width, not including the eyes. |
| Mandible Length (ML) | Length of the mandibles from apex to the anterior clypeal margin. |
| Scape Length (SL) | Length of the antennal scape from condylar bulb to scape apex. |
| Pronotal Width (PW) | Maximum width of the pronotum. |
| Alitrunk Length (AL) | Diagonal length of the alitrunk (=mesosoma) in lateral view. |
| Cephalic Index (CI) | Cephalic index: CI = (HW / HL) x 100. |
| Mandibular Index (MI) | Mandibular Index: MI = (ML / HL) x 100. |
| Scape Index (SI) | Scape Index: SI = (SL / HW) x 100. |
